# Supplementary material for: Further findings of X-ray absorption near-edge structure in lithium manganese spinel oxide using first-principles calculations
Source: Royal Society of Chemistry journal article supplement (doi:10.1039/c3ta15412b), 2014-01-01
Supplement: c3ta15412b1.pdf [file c3ta15412b1.pdf]

**Electronic Supplementary Information**

**Further Findings of X-ray Absorption Near-Edge Structure in Lithium Manganese Spinel Oxide with First-Principles Calculations**

Toyoki Okumura,\* Yoichi Yamaguchi, Masahiro Shikano,  
and Hironori Kobayashi\*

*Research Institute for Ubiquitous Energy Devices, National Institute of  
Advanced Industrial Science and Technology (AIST), 1-8-31 Midorigaoka,  
Ikeda, Osaka 563-8577, Japan*

\*E-mail: [toyoki-okumura@aist.go.jp](mailto:toyoki-okumura@aist.go.jp); [hironori-kobayashi@aist.go.jp](mailto:hironori-kobayashi@aist.go.jp)

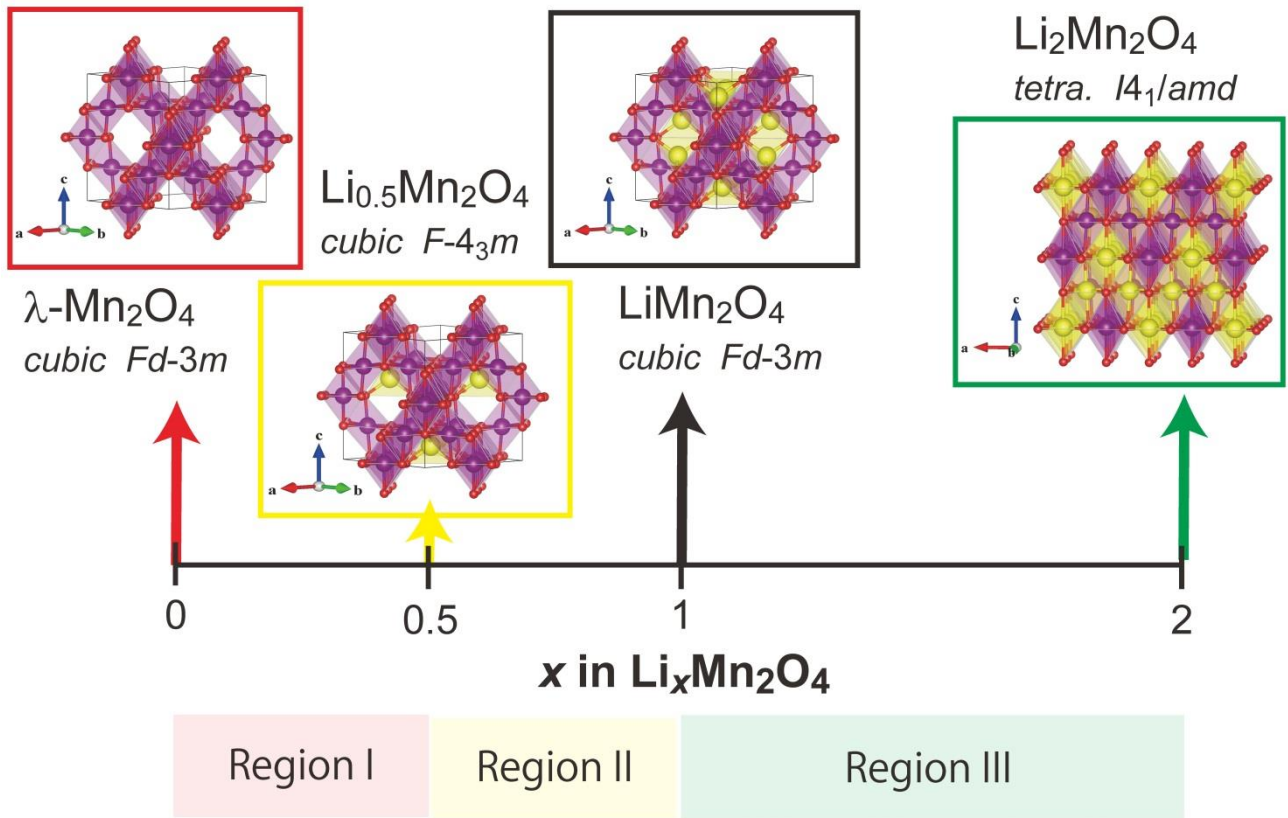

**Fig. S1** Schematic diagram of the phase transitions during de-intercalation or intercalation from  $\text{Li}_x\text{Mn}_2\text{O}_4$  ( $x = 1$ ). Purple octahedrons represent  $\text{MnO}_6$ , red balls indicate oxide ions, and yellow balls represent lithium ions.

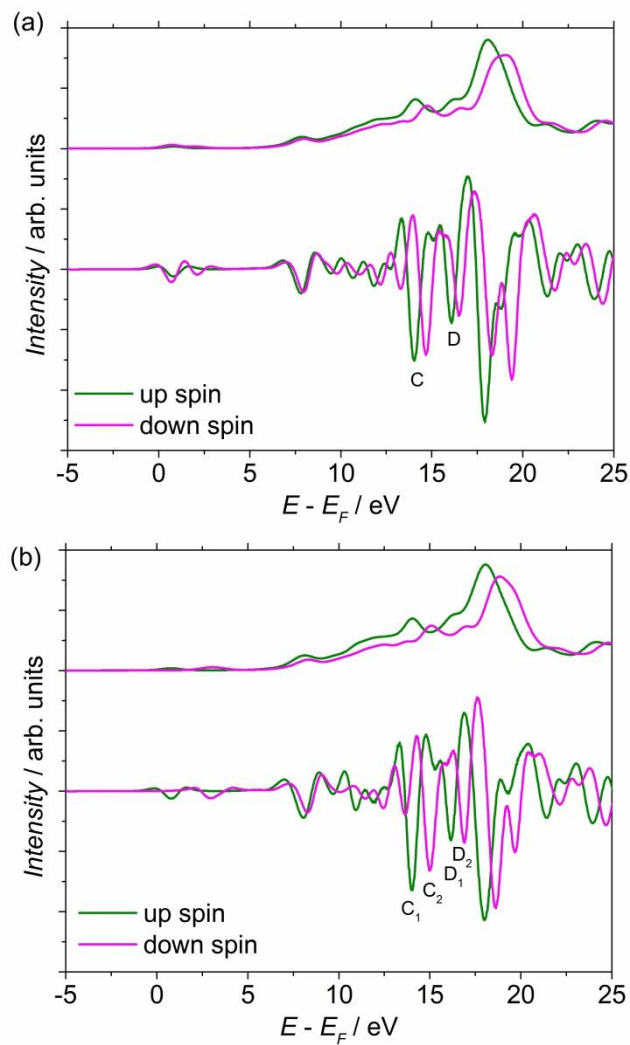

**Fig. S2** Theoretical Mn *K*-edge XANES spectra corresponding to up spins (green curves) and down spins (pink curves) of  $\text{LiMn}_2\text{O}_4$  calculated by (a) GGA and (b) GGA+*U*. Second-order differential curves of the XANES spectra are also shown on the bottom to clearly visualize each peak.

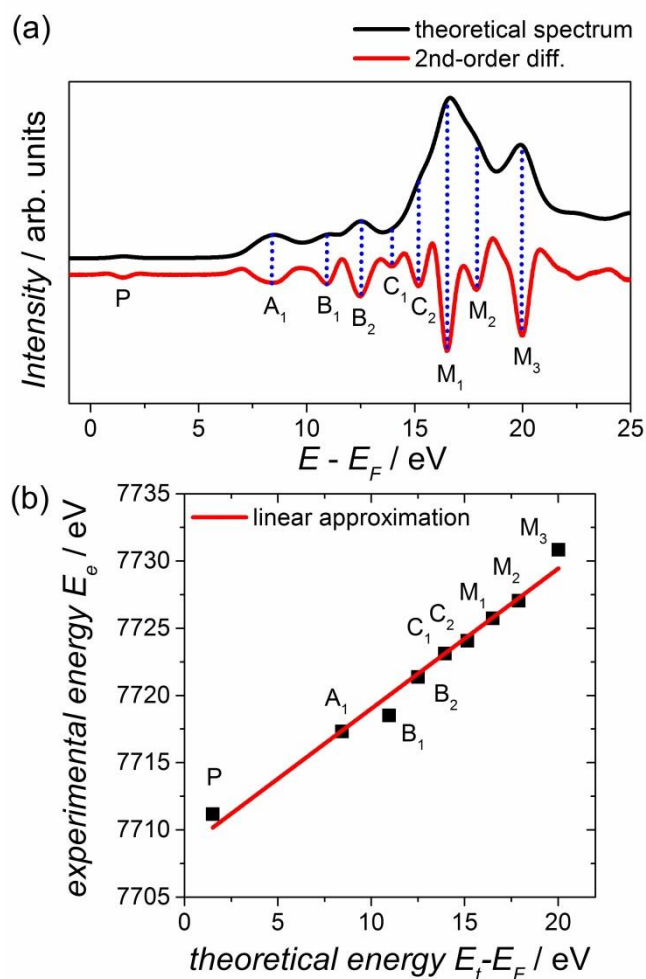

**Fig. S3** (a) Theoretical Co K-edge XANES spectra of O3-LiCoO<sub>2</sub> calculated by GGA (black curves). Second-order differential curves of the XANES spectra are also shown to clearly visualize each peak (red curves). (b) The comparative plots of the theoretical peak energies with experimental energies ( $E_t - E_F = \alpha E_e + \beta$ ,  $\alpha = 1.04$ ,  $\beta = 7708.60$ ,  $R^2 = 0.977$ ).

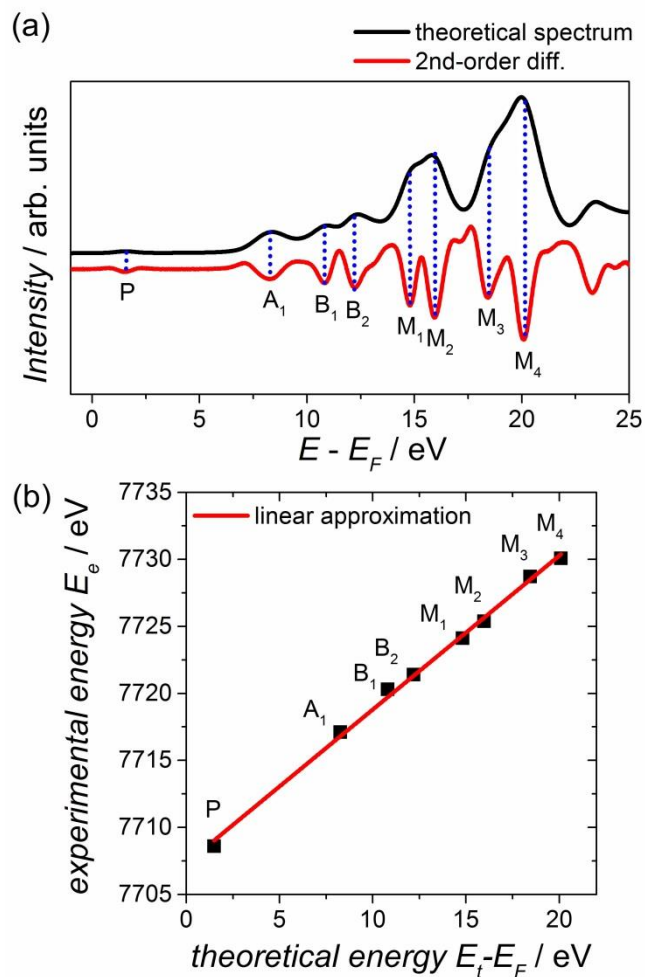

**Fig. S4** (a) Theoretical Co K-edge XANES spectra of O<sub>2</sub>-LiCoO<sub>2</sub> calculated by GGA (black curves). Second-order differential curves of the XANES spectra are also shown to clearly visualize each peak (red curves). (b) The comparative plots of the theoretical peak energies with experimental energies ( $E_t - E_F = \alpha E_e + \beta$ ,  $\alpha = 1.15$ ,  $\beta = 7707.32$ ,  $R^2 = 0.997$ ).

**Table S1 Crystallographic parameters of models and XANES simulating conditions for DFT calculation**

| Model                                                                     | Unit-cell formula                                                                             | Space Group               | Lattice parameter / Å <sup>a)</sup> |       |       | Super cell | k-point grid <sup>b)</sup> |                  |           |
|---------------------------------------------------------------------------|-----------------------------------------------------------------------------------------------|---------------------------|-------------------------------------|-------|-------|------------|----------------------------|------------------|-----------|
|                                                                           |                                                                                               |                           | a                                   | b     | c     |            | SCF (GS)                   | SCF & XANES (ES) |           |
| LiMn <sub>2</sub> O <sub>4</sub>                                          | Li <sub>8</sub> Mn <sub>16</sub> O <sub>32</sub>                                              | <i>Fd-3m</i>              | 8.248                               | = a   | = a   | 1 x 1 x 1  | 12 x 12 x 12               | 4 x 4 x 4        |           |
| LiMn <sup>3+</sup> Mn <sup>4+</sup> O <sub>4</sub><br>AFM-1 <sup>c)</sup> | Li <sub>4</sub> (Mn <sub>4</sub> <sup>3+</sup> Mn <sub>4</sub> <sup>4+</sup> )O <sub>16</sub> | <i>C2/c</i>               | 8.137                               | 8.386 | 5.839 | β = 47.63  | 1 x 2 x 1                  | 12 x 12 x 12     | 4 x 4 x 4 |
| LiMn <sup>3+</sup> Mn <sup>4+</sup> O <sub>4</sub><br>AFM-2 <sup>c)</sup> | Li <sub>4</sub> (Mn <sub>4</sub> <sup>3+</sup> Mn <sub>4</sub> <sup>4+</sup> )O <sub>16</sub> | <i>Imma</i>               | 5.750                               | = b   | 8.707 |            | 2 x 2 x 1                  | 12 x 12 x 12     | 4 x 4 x 4 |
| Li <sub>0.5</sub> Mn <sub>2</sub> O <sub>4</sub>                          | Li <sub>4</sub> Mn <sub>16</sub> O <sub>32</sub>                                              | <i>F-4<sub>3</sub>m</i>   | 8.144                               | = a   | = a   |            | 1 x 1 x 1                  | 12 x 12 x 12     | 4 x 4 x 4 |
| ∅-Mn <sub>2</sub> O <sub>4</sub>                                          | Mn <sub>16</sub> O <sub>32</sub>                                                              | <i>Fd-3m</i>              | 8.033                               | = a   | = a   |            | 1 x 1 x 1                  | 12 x 12 x 12     | 4 x 4 x 4 |
| Li <sub>2</sub> Mn <sub>2</sub> O <sub>4</sub>                            | Li <sub>8</sub> Mn <sub>8</sub> O <sub>16</sub>                                               | <i>I4<sub>1</sub>/amd</i> | 5.649                               | = a   | 9.198 |            | 2 x 1 x 1                  | 12 x 12 x 12     | 4 x 4 x 4 |

a) Lattice parameters were input with Ref [1]-[4]. ([1] *Chem. Mater.* **2000**, 12, 3246., [2] *J. Cryst. Growth* **2001**, 229, 405., [3] *J. Electrochem. Soc.* **2004**, 151, A296., [4] *Chem. Mater.* **1999**, 11, 1936.)

b) GS and ES denote the ground and excited states, respectively.

c) Two anti-ferromagnetic (AFM) structures were modeled and full-optimized under each space group using Wien2k DFT-code.

**Table S2 Ratios of crystal phases in lithium-ion intercalated/de-intercalated Li<sub>x</sub>Mn<sub>2</sub>O<sub>4</sub> samples estimated by Rietveld analysis of synchrotron X-ray diffraction**

| Model                                             | Phase | Space Group               | R <sub>wp</sub> | S      | Molar Ratio / % |
|---------------------------------------------------|-------|---------------------------|-----------------|--------|-----------------|
| LiMn <sub>2</sub> O <sub>4</sub>                  | 1     | <i>Fd-3m</i>              | 5.888           | 1.5285 | 100             |
| Li <sub>0.75</sub> Mn <sub>2</sub> O <sub>4</sub> | 1     | <i>Fd-3m</i>              | 6.038           | 1.6654 | 100             |
| Li <sub>0.5</sub> Mn <sub>2</sub> O <sub>4</sub>  | 1     | <i>Fd-3m</i>              | 6.301           | 1.7461 | 100             |
| Li <sub>0.25</sub> Mn <sub>2</sub> O <sub>4</sub> | 1     | <i>Fd-3m</i>              | 4.062           | 0.9689 | 43.3            |
|                                                   | 2     | <i>Fd-3m</i>              |                 |        | 56.7            |
| Li <sub>0.08</sub> Mn <sub>2</sub> O <sub>4</sub> | 1     | <i>Fd-3m</i>              | 5.651           | 1.5534 | 100             |
|                                                   | 1     | <i>Fd-3m</i>              | 5.780           | 1.6483 | 68.6            |
| Li <sub>1.25</sub> Mn <sub>2</sub> O <sub>4</sub> | 2     | <i>I4<sub>1</sub>/amd</i> |                 |        | 31.4            |
|                                                   | 1     | <i>Fd-3m</i>              | 6.312           | 1.7795 | 37.8            |
| Li <sub>1.5</sub> Mn <sub>2</sub> O <sub>4</sub>  | 2     | <i>I4<sub>1</sub>/amd</i> |                 |        | 62.2            |
|                                                   | 1     | <i>Fd-3m</i>              | 6.261           | 1.7916 | 22.6            |
| Li <sub>1.66</sub> Mn <sub>2</sub> O <sub>4</sub> | 2     | <i>I4<sub>1</sub>/amd</i> |                 |        | 77.4            |
